# Supplementary material for: Multiplex Identification of Human Papillomavirus 16 DNA Integration Sites in Cervical Carcinomas
Source: PLoS One. 2013 Jun 18;8(6):e66693. doi: 10.1371/journal.pone.0066693 (PMC3688939; doi:10.1371/journal.pone.0066693)
Supplement: Table S3 — HPV16-cellular DNA junctions validated by junction-PCR (sorted by sample ID). (DOC) [file pone.0066693.s004.doc]

**Table S3. HPV16-cellular DNA junctions validated by junction-PCR (sorted by sample ID).**

|  |  | **HPV16** | **Cellular Sequence** | | | | **Cellular Gene** | | | **Accession** |
| --- | --- | --- | --- | --- | --- | --- | --- | --- | --- | --- |
| **DJ1)** | **Sample** | **breakpoint (ORF)** | **breakpoint** | **map** | **strand** | **u/r2)** | **name** | **t/d3)** | **orientation4)** | **Number** |
| 0018_DJ1 | T18 | 3048 (E2) | 169306956 | 3q26.2 | + | u | *MECOM* | t | opposite | HE984501 |
| 0182_DJ1 | T182e | 2725 (E1) | 58836257 | 15q22.2 | + | u | *LIPC* | t | same | HE984502 |
| 0186_DJ1 | T186e | 2590 (E1) | 26947928 | 9p21.2 | – | u | *IFT74* | t | opposite | HE984503 |
| 0186_DJ2 | T186e | 3897 (E5) | 30498221 | 19q11 | + | u | *URI1* | t | same | HE984504 |
| 0841_DJ1 | T841 | 2412 (E1) | 206103492 | 2q33.3 | – | r (AluSq) | *PARD3B* | t | opposite | HE984505 |
| 0841_DJ2 | T841 | 1953 (E1) | 73677253 | 13q22.1 | – | u | *KLF5* | d | opposite | HE984506 |
| 0841_DJ3 | T841 | 3281 (E2) | 74226231 | 13q22.2 | + | u | *KLF12* | d | opposite | HE984507 |
| 0841_DJ4 | T841 | 3413 (E2) | 24333382 | Xp22.11 | – | u | *FAM48B2* | d | same | HE984508 |
| 0841_DJ5 | T841 | 1703 (E1) | 24564835 | Xp22.11 | – | u | *PDK3* | d | opposite | HE984509 |
| 0892_DJ1 | T892 | 2970 (E2) | 27869352 | 2p23.2 | + | u | *GPN1* | t | same | HE984510 |
| 0892_DJ2 a) | T892 | 2886 (E2) | 27869153 | 2p23.2 | – | r (AluSx) | *GPN1* | t | opposite | HE984511 |
| 0940_DJ1 | T940 | 1529 (E1) | 124850317 | Xq25 | + | u | *DCAF12L2* | d | opposite | HE984512 |
| 1509_DJ1 | T1509 | 2686 (E1) | 113482518 | 8q23.3 | + | u | *CSMD3* | t | opposite | HE984513 |
| 1509_DJ2 | T1509 | 1228 (E1) | 33980798 | 9p13.3 | + | r (AluJb) | *UBAP2* | t | opposite | HE984514 |
| 1686_DJ1 | T1686 | 1354 (E1) | 57908866 | 17q23.2 | – | u | *VMP1* | t | opposite | HE984515 |
| 1875_DJ1 | T1875 | 3010 (E2) | 201823720 | 2q33.1 | + | u | *ORC2* | t | opposite | HE984516 |
| 1907_DJ1 | T1907U | 2412 (E1) | 62135042 | 14q23.2 | + | u | *HIF1A* | d | same | HE984517 |
| 2085_DJ1 | T2085 | 2774 (E1/E2) | 149157969 | 2q23.1 | + | u | *MBD5* | t | same | HE984518 |
| 2085_DJ2 | T2085 | 2198 (E1) | 11918118 | 16p13.13 | – | u | *BCAR4* | t | same | HE984519 |
| 2209_DJ1 | T2209 | 2637 (E1) | 74255979 | 13q22.2 | + | u | *KLF12* | d | opposite | HE984520 |
| 2231_DJ1 b) | T2231 | 1030 (E1) | 191040400 | 4q35.2 | – | r (MER31_I) | *DUX4L2* | d | opposite | HE984521 |
| 2317_DJ1 | T2317 | 3667 (E2) | 230045578 | 2q36.3 | + | u | *PID1* | t | opposite | HE984522 |
| 2317_DJ2 | T2317 | 1028 (E1) | 90729527 | 15q26.1 | – | u | *SEMA4B* | t | opposite | HE984523 |
| 2319_DJ1 c) | T2319 | 4338 (L2) | 10707431 | 1p36.22 | + | u | *CASZ1* | t | opposite | HE984524 |
| 2319_DJ2 c) | T2319 | 3115 (E2) | 10699282 | 1p36.22 | – | u | *CASZ1* | t | same | HE984525 |
| 2319_DJ3 c) | T2319 | 910 (E1) | 10697545 | 1p36.22 | – | u | *CASZ1* | t | same | HE984526 |
| 2349_DJ1 | T2349 | 2949 (E2) | 7521372 | Xp22.31 | – | u | *STS* | d | opposite | HE984527 |
| 2548_DJ1 | T2548 | 2868 (E2) | 60486966 | 3p14.2 | – | u | *FHIT* | t | same | HE984528 |
| 2548_DJ2 | T2548 | 1921 (E1) | 60535200 | 3p14.2 | + | u | *FHIT* | t | opposite | HE984529 |
| 2548_DJ3 | T2548 | 2019 (E1) | 963052 | 19p13.3 | – | u | *ARID3A* | t | opposite | HE984530 |
| 2548_DJ4 | T2548 | 3890 (E5) | 2080380 | 19p13.3 | – | u | *MOB3A* | t | same | HE984531 |
| 2548_DJ5 | T2548 | 2406 (E1) | 14886856 | 20p12.1 | + | r (AluSz) | *MACROD2* | t | same | HE984532 |
| 2548_DJ6 | T2548 | 3888 (E5) | 32116640 | 20q11.22 | + | u | *CBFA2T2* | t | same | HE984533 |
| 2592_DJ1 | T2592 | 1948 (E1) | 4583408 | 5p15.32 | – | u | *no gene* |  |  | HE984534 |
| 2707_DJ1 | T2707 | 3564 (E2) | 37818061 | 17q21.31 | + | u | *STARD3* | t | same | HE984535 |
| 2707_DJ2 | T2707 | 2970 (E2) | 37862307 | 17q21.31 | – | u | *ERBB2* | t | opposite | HE984536 |
| 2882_DJ1 | T2882 | 3596 (E2) | 146512049 | 2q22.3 | – | u | *no gene* |  |  | HE984537 |
| 2967_DJ1 | T2967 | 2132 (E1) | 19610972 | 19p13.11 | + | u | *GATAD2A* | t | same | HE984538 |
| 3256_DJ1 | T3256 | 1642 (E1) | 182088476 | 3q26.33 | + | u | *ATP11B* | d | same | HE984539 |
| 3256_DJ2 | T3256 | 2344 (E1) | 100058840 | 10q24.2 | – | u | *LOXL4* | d | same | HE984540 |
| 3256_DJ3 | T3256 | 2612 (E1) | 100058865 | 10q24.2 | + | u | *PYROXD2* | d | opposite | HE984541 |
| 3427_DJ1 | T3427 | 1794 (E1) | 12233422 | 12p13.2 | – | r (AluSg) | *BCL2L14* | t | opposite | HE984542 |
| 3427_DJ2 | T3427 | 2461 (E1) | 19657318 | 17p11.2 | + | u | *ULK2* | d | opposite | HE984543 |
| 3576_DJ1 | T3576 | 2350 (E1) | 44184762 | 6p21.1 | + | u | *SLC29A1* | d | same | HE984544 |
| 3719_DJ1 | T3719 | 2823 (E2) | 34896821 | 2p22.3 | – | r (L1M1_5) | *no gene* |  |  | HE984545 |
| 3719_DJ2 | T3719 | 2615 (E1) | 78848346 | 4q21.1 | – | u | *MRPL1* | t | opposite | HE984546 |
| 3966_DJ1 d) | T3966 | 2990 (E2) | 74540049 | 4q13.3 | + | u | *IL8* | d | same | HE984547 |
| 3987_DJ1 | T3987 | 3489 (E2) | 212251450 | 2q34 | + | u | *ERBB4* | t | opposite | HE984548 |
| 4024_DJ1 | T4024 | 3018 (E2) | 17517026 | Xp22.13 | + | u | *NHS* | t | same | HE984549 |
| 4024_DJ2 e) | T4024 | 1841 (E1) | 100450200 | 4q23 | – | u | *C4orf17* | t | opposite | HE984550 |
| 4046_DJ1 | T4046 | 2146 (E1) | 73999476 | 13q22.1 | – | u | *KLF5* | d | opposite | HE984551 |
| 4426_DJ1 e) | T4426 | 2080 (E1) | 190056682 | 3q28 | – | u | *CLDN1* | d | same | HE984552 |
| 4601_DJ1 | T4601 | 999 (E1) | 13858043 | 9p23 | + | u | *LINC00583* | d | same | HE984553 |
| 4749_DJ1 | T4749 | 2564 (E1) | 1493334 | 18p11.32 | + | r (L1) | *no gene* |  |  | HE984554 |
| 4749_DJ2 | T4749 | 1027 (E1) | 1506143 | 18p11.32 | – | u | *LINC00470* | d | same | HE984555 |
| 4749_DJ3 | T4749 | 3337 (E2) | 34242009 | 18q12.2 | + | u | *FHOD3* | t | same | HE984556 |
| 4793_DJ1 f) | T4793 | 1932 (E1) |  |  |  | r (GGAAT) |  |  |  | HE984557 |
| 4793_DJ2 f) | T4793 | 3881 (E5) |  |  |  | r (GGAAT) |  |  |  | HE984558 |
| 4793_DJ3 g) | T4793 | 1226 (E1) | 126291635 | 9q33.3 | + | u | *DENND1A* | t | opposite | HE999548 |
| 4977_DJ1 | T4977 | 2143 (E1) | 126782491 | 6q22.32 | – | r (LTR) | *CENPW* | d | opposite | HE984559 |
| 4977_DJ2 | T4977 | 3059 (E2) | 28835005 | 7p15.1 | – | u | *CREB5* | t | opposite | HE984560 |
| 5066_DJ1 | T5066 | 2470 (E1) | 11159613 | 20p12.2 | + | u | *no gene* |  |  | HE984561 |
| 5066_DJ2 | T5066 | 1813 (E1) | 61969363 | 7q11.21 | – | r (ALR1) | *no gene* |  |  | HF559481 |
| 5189_DJ1 | T5189 | 3286 (E2) | 25574739 | 5p14.1 | + | u | *no gene* |  |  | HE984562 |
| 5189_DJ2 | T5189 | 2627 (E1) | 111272354 | 8q23.2 | + | r (L1) | *no gene* |  |  | HE984563 |
| 5189_DJ3 | T5189 | 2353 (E1) | 128396523 | 8q24.21 | + | r (AluY) | *POU5F1B* | d | same | HE984564 |
| 5234_DJ1 | T5234 | 2574 (E1) | 49319411 | 3p21.31 | – | r (AluSc) | *USP4* | t | same | HE984565 |
| CS_DJ1 h) | CaSki | 3729 (E2) | 45659125 | 6p12.3 | – | u | *RUNX2* | d | opposite | HE984566 |
| CS_DJ2 | CaSki | 1973 (E1) | 11742450 | 10p14 | – | u | *USP6NL* | d | same | HE984567 |
| CS_DJ3 | CaSki | 975 (E1) | 144778296 | Xq27.3 | + | u | *SLITRK2* | d | same | HE984568 |
| CS_DJ4 | CaSki | 2987 (E2) | 144789749 | Xq27.3 | + | u | *SLITRK2* | d | same | HE984569 |
| MH186_DJ1 | MRI–H186 | 1224 (E1) | 128675817 | 8q24.21 | + | u | *MYC* | d | same | HE984570 |
| MH186_DJ2 | MRI–H186 | 2754 (E1) | 128746603 | 8q24.21 | + | u | *MYC* | d | same | HE984571 |
| MH196_DJ1 | MRI–H196 | 3858 (E5) | 47967861 | 11p11.2 | + | u | *PTPRJ* | d | same | HE984572 |
| SH_DJ1 | SiHa | 3133 (E2) | 74087562 | 13q22.1 | – | u | *KLF5* | d | opposite | HE984573 |

1) DJ = DNA junction.

2) u/r: u = unique cellular sequence; r = repetitive cellular sequence; the names of repeat sequences are given in parentheses.

3) t/d: t = gene directly targeted by HPV16 integration; d = the first gene located within 500 kb downstream of the DNA junction.

4) Orientation of the cellular gene with regard to the early region of integrated HPV16 DNA.

a) DNA junction 0892_DJ2 contains repetitive cellular sequence (AluSx), but could be assigned to chromosome 2 by taking into account the other DNA junction (0892_DJ1) and the RNA junction (0892_RJ; Table 2 and Figure 3).

b) DNA junction 2231_DJ1 was first mapped to two chromosome regions 4p16.3 and 4q35.2 with long identical sequences downstream of the junction. The mapping was then refined by long-range PCR to be on 4q35.2.

c) DNA junctions 2319_DJ1, DJ2 and DJ3 were discovered in the TEN16 sequence library by searching for DNA junctions located upstream of the identified RNA junction 2319_RJ (Table 2 and Figure 3). DJ2 contains a 65-bp sequence of chromosome 15 between HPV16 and chromosome 1 sequences. DJ1 and DJ3 were below the cutoff of 15 read pairs. DJ1 has also been identified by DIPS-PCR [see reference 44].

d) DNA junction 3966_DJ1 was identified in the TEN16 sequence library after the second-round sequence-sorting.

e) DNA junctions 4024_DJ2 and 4426_DJ1 with <15 read pairs each were discovered by searching in the TEN16 sequence library for DNA junctions located upstream of the identified RNA junctions (Table 2).

f) Chromosome mapping of 4793_DJ1 and DJ2 was impossible because the flanking cellular sequences are composed mainly of the simple repeat sequence GGAAT.

g) DNA junction 4793_DJ3 with <15 read pairs was discovered by searching in the TEN16 sequence library for additional DNA junctions in the respective barcode.

h) DNA junction CS_DJ1 with <15 read pairs was discovered by searching in the TEN16 sequence library for the known junction sequence [see reference 54].
